# Supplementary material for: Barriers to the Provision of Preventive Care to People Living with Mental Health Conditions: Self-Report by Staff Working in an Australian Community Managed Organisation
Source: MDPI journal article supplement (doi:10.3390/ijerph19084458), 2022-04-07
Supplement: s1 [file s1]

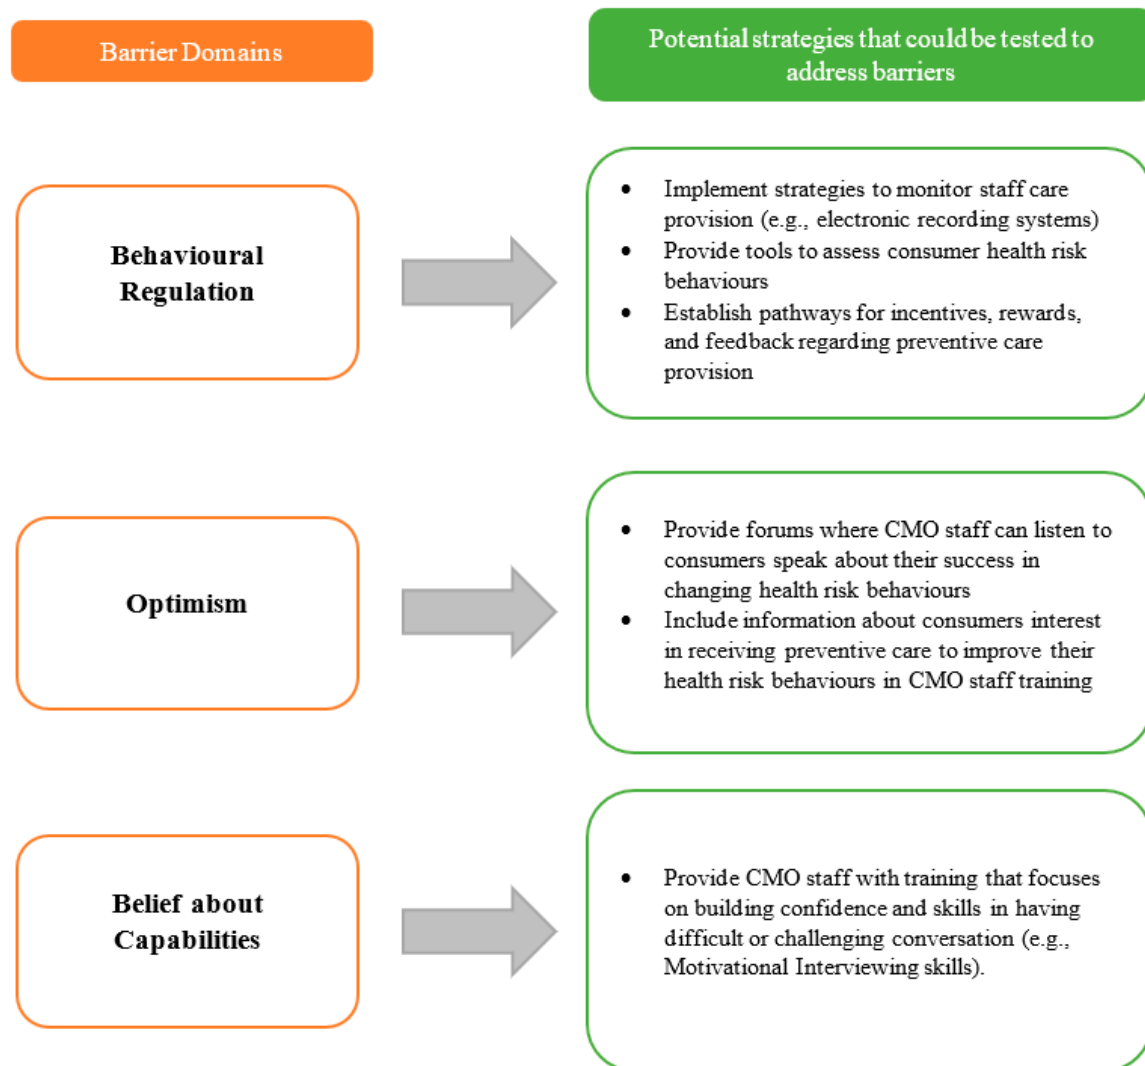

**Figure S1.** Top Three Barrier Domains reported by CMO staff and potential strategies that could be tested to address these barriers.

**Table S1.** All TDF survey items and responses.

|                             |                                                                                                                                   | Strongly<br>Disagree | Disagree | Somewhat<br>Disagree | Unsure | Somewhat<br>Agree | Agree | Strongly<br>Agree |
|-----------------------------|-----------------------------------------------------------------------------------------------------------------------------------|----------------------|----------|----------------------|--------|-------------------|-------|-------------------|
|                             |                                                                                                                                   | %                    | %        | %                    | %      | %                 | %     | %                 |
| <b>Knowledge and Skills</b> |                                                                                                                                   |                      |          |                      |        |                   |       |                   |
|                             | I have the knowledge and skills to ask people accessing the service:                                                              |                      |          |                      |        |                   |       |                   |
| 1                           | Whether they smoke (n=185)                                                                                                        | 0.5                  | 0.5      | 1.6                  | 2.2    | 8.6               | 31    | 55                |
| 2                           | About their fruit and vegetable consumption (n=186)                                                                               | 0                    | 0.5      | 1.1                  | 4.8    | 7.5               | 36    | 51                |
| 3                           | How many standard drinks of alcohol they consume (n=185)                                                                          | 0                    | 2.2      | 1.1                  | 6.5    | 11                | 33    | 46                |
| 4                           | About their current physical activity (n=186)                                                                                     | 0                    | 0.5      | 1.1                  | 3.2    | 7.0               | 36    | 52                |
|                             | I have the knowledge and skills to provide brief advice to people accessing the service on how to:                                |                      |          |                      |        |                   |       |                   |
| 5                           | Quit or reduce smoking (n=185)                                                                                                    | 0.5                  | 2.7      | 1.1                  | 5.4    | 17                | 33    | 41                |
| 6                           | Increase their fruit and vegetable consumption (n=186)                                                                            | 0                    | 1.1      | 2.7                  | 3.8    | 8.6               | 40    | 44                |
| 7                           | Reduce their alcohol consumption (n=185)                                                                                          | 0                    | 2.7      | 3.2                  | 6.5    | 15                | 34    | 40                |
| 8                           | Increase their physical activity (n=186)                                                                                          | 0                    | 1.1      | 2.2                  | 3.2    | 7.0               | 40    | 46                |
|                             | I have the knowledge and skills to connect people accessing the service with behaviour change support services to help them with: |                      |          |                      |        |                   |       |                   |
| 9                           | Quitting smoking or reducing the amount they smoke (n=184)                                                                        | 0.5                  | 2.2      | 2.7                  | 5.4    | 13                | 36    | 40                |
| 10                          | Increasing their fruit and vegetable consumption (n=185)                                                                          | 0.5                  | 1.6      | 1.6                  | 4.3    | 8.6               | 41    | 43                |
| 11                          | Reducing their alcohol consumption (n=185)                                                                                        | 0.5                  | 1.1      | 2.7                  | 5.9    | 12                | 40    | 38                |
| 12                          | Increasing their physical activity (n=185)                                                                                        | 0                    | 0.5      | 1.6                  | 3.8    | 12                | 39    | 43                |
|                             | I know where I can connect people so they can get help with:                                                                      |                      |          |                      |        |                   |       |                   |

|    |                                                            |   |     |     |     |    |    |    |
|----|------------------------------------------------------------|---|-----|-----|-----|----|----|----|
| 13 | Quitting smoking or reducing the amount they smoke (n=182) | 0 | 2.7 | 1.6 | 2.7 | 18 | 35 | 41 |
| 14 | Increasing their fruit and vegetable consumption (n=183)   | 0 | 1.6 | 1.6 | 3.3 | 13 | 40 | 41 |
| 15 | Reducing their alcohol consumption (n=183)                 | 0 | 1.6 | 1.6 | 4.4 | 16 | 35 | 42 |
| 16 | Increasing their physical activity (n=183)                 | 0 | 2.2 | 0.5 | 2.2 | 12 | 40 | 44 |

#### **Social and Professional Role and Identity**

|    |                                                                                                              |     |     |     |     |    |    |    |
|----|--------------------------------------------------------------------------------------------------------------|-----|-----|-----|-----|----|----|----|
| 17 | <sup>a</sup> I believe providing preventive support is as important as other aspects of my role (n=177)      | 1.1 | 5.6 | 7.3 | 6.2 | 25 | 39 | 15 |
| 18 | I believe it should be part of my role to provide preventive support to people accessing the service (n=168) | 0   | 4.8 | 0.6 | 3.0 | 21 | 41 | 30 |
| 19 | I believe it should be part of my organisation's role to provide preventive support (n=165)                  | 0   | 0.6 | 2.4 | 8.5 | 17 | 41 | 31 |

#### **Belief About Capabilities**

I am confident that I can provide preventive support to people accessing the service regarding:

|    |                                                            |     |     |     |     |    |    |    |
|----|------------------------------------------------------------|-----|-----|-----|-----|----|----|----|
| 20 | Quitting smoking or reducing the amount they smoke (n=181) | 0.6 | 2.2 | 2.2 | 6.1 | 19 | 43 | 27 |
| 21 | Increasing their fruit and vegetable consumption (n=182)   | 0.5 | 1.6 | 1.6 | 4.4 | 12 | 46 | 34 |
| 22 | Reducing their alcohol consumption (n=182)                 | 0.5 | 1.6 | 3.3 | 6.0 | 18 | 42 | 28 |
| 23 | Increasing their physical activity (n=182)                 | 0.5 | 1.6 | 1.1 | 4.4 | 12 | 42 | 38 |

<sup>a</sup> I do not find it challenging to provide preventive support to people accessing the service regarding:

|                                  |                                                                                                                                                          |     |     |     |     |     |    |     |
|----------------------------------|----------------------------------------------------------------------------------------------------------------------------------------------------------|-----|-----|-----|-----|-----|----|-----|
| 24                               | Quitting smoking or reducing the amount they smoke (n=181)                                                                                               | 8.3 | 20  | 23  | 6.1 | 8.8 | 20 | 13  |
| 25                               | Increasing their fruit and vegetable consumption (n=182)                                                                                                 | 6.0 | 18  | 20  | 6.6 | 15  | 20 | 14  |
| 26                               | Reducing their alcohol consumption (n=182)                                                                                                               | 6.0 | 20  | 21  | 8.2 | 10  | 21 | 13  |
| 27                               | Increasing their physical activity (n=182)                                                                                                               | 8.8 | 16  | 19  | 6.0 | 13  | 21 | 16  |
| <b>Optimism</b>                  |                                                                                                                                                          |     |     |     |     |     |    |     |
| 28                               | <sup>a</sup> I am optimistic that people accessing the service will follow-up the connections I make to health behaviour supports (n=178)                | 3.4 | 16  | 25  | 20  | 17  | 15 | 3.9 |
| 29                               | I am optimistic that my organisation could provide effective preventive support (n=178)                                                                  | 0   | 0   | 1.7 | 7.3 | 14  | 43 | 35  |
| <b>Belief About Consequences</b> |                                                                                                                                                          |     |     |     |     |     |    |     |
| 30                               | <sup>a</sup> I believe providing preventive support will not have a negative impact on the relationship I have with people accessing the service (n=180) | 2.2 | 5.6 | 8.3 | 13  | 17  | 36 | 18  |
| 31                               | I believe providing preventive support to people accessing the service will benefit their physical health (n=176)                                        | 0.6 | 0.6 | 0.6 | 2.3 | 9.7 | 42 | 44  |
| 32                               | I believe providing preventive support to people accessing the service will benefit their mental health (n=176)                                          | 1.7 | 0.6 | 0.6 | 2.9 | 6.9 | 36 | 51  |
| <b>Reinforcement</b>             |                                                                                                                                                          |     |     |     |     |     |    |     |
| 33                               | People accessing the service appreciate the preventive support I offer them (n=157) <sup>b</sup>                                                         | 1.3 | 1.9 | 2.5 | 23  | 31  | 30 | 10  |
| 34                               | I receive a sense of satisfaction when I provide preventive support (n=151) <sup>b</sup>                                                                 | 0.7 | 0   | 1.5 | 8.8 | 20  | 37 | 32  |
| 35                               | <sup>a</sup> I receive recognition from my employer when I provide preventive support (n=141) <sup>b</sup>                                               | 4.3 | 4.3 | 14  | 26  | 11  | 27 | 14  |

**Intentions**

|    |                                                                    |   |     |     |     |    |    |    |
|----|--------------------------------------------------------------------|---|-----|-----|-----|----|----|----|
| 36 | I would like to improve my provision of preventive support (n=173) | 0 | 3.5 | 1.2 | 6.4 | 20 | 44 | 25 |
|----|--------------------------------------------------------------------|---|-----|-----|-----|----|----|----|

**Goals**

|    |                                                                                                   |   |     |     |    |    |    |    |
|----|---------------------------------------------------------------------------------------------------|---|-----|-----|----|----|----|----|
| 37 | It is a reasonable goal to provide preventive support to all people accessing the service (n=166) | 0 | 4.8 | 7.8 | 11 | 15 | 36 | 26 |
|----|---------------------------------------------------------------------------------------------------|---|-----|-----|----|----|----|----|

**Memory, Attention, and Decision****Processes**

|    |                                                                                   |     |     |    |    |    |    |     |
|----|-----------------------------------------------------------------------------------|-----|-----|----|----|----|----|-----|
| 38 | <sup>a</sup> Providing preventive support is not something I forget to do (n=165) | 5.5 | 4.8 | 18 | 14 | 18 | 35 | 4.8 |
|----|-----------------------------------------------------------------------------------|-----|-----|----|----|----|----|-----|

**Environmental Context and Resources**

|    |                                                                                                                                            |     |     |     |     |     |     |     |
|----|--------------------------------------------------------------------------------------------------------------------------------------------|-----|-----|-----|-----|-----|-----|-----|
| 39 | <sup>a</sup> Providing preventive support to people accessing the service is feasible (n=177)                                              | 0.6 | 3.4 | 2.8 | 8.5 | 20  | 41  | 23  |
| 40 | Preventive support should be offered to people accessing the service whether or not they have expressed an interest (n=178)                | 1.1 | 2.8 | 4.5 | 14  | 22  | 32  | 24  |
| 41 | <sup>a</sup> A person's interest does not drive whether I provide them with preventive support (n=175)                                     | 13  | 26  | 30  | 11  | 8.6 | 9.7 | 1.1 |
| 42 | <sup>a</sup> Improving the physical health of individuals with a mental health issue is a priority within the mental health sector (n=172) | 1.2 | 3.5 | 9.9 | 5.8 | 18  | 36  | 26  |
| 43 | <sup>a</sup> Preventive support fits well with a person-led approach (n=166)                                                               | 0.6 | 2.4 | 13  | 16  | 17  | 37  | 15  |
| 44 | Preventive support fits well with my general provision of support (n=167)                                                                  | 0   | 2.4 | 0.6 | 15  | 23  | 40  | 20  |
| 45 | I would welcome more resources and aids to assist my provision of preventive support (n=167)                                               | 0.6 | 0   | 0   | 6.6 | 17  | 35  | 41  |
| 46 | There is someone within my organisation who can provide advice or guidance about my provision of preventive support (n=164)                | 0   | 3.0 | 6.1 | 26  | 14  | 36  | 15  |

|    |                                                                                                                          |     |     |     |     |     |    |     |
|----|--------------------------------------------------------------------------------------------------------------------------|-----|-----|-----|-----|-----|----|-----|
| 47 | <sup>a</sup> There is enough time to provide preventive support to people accessing the service (n=165)                  | 5.5 | 4.8 | 18  | 14  | 18  | 35 | 4.8 |
| 48 | <sup>a</sup> It is possible to tailor preventive support to the individual needs of people accessing the service (n=166) | 0   | 2.4 | 5.4 | 14  | 22  | 39 | 18  |
| 49 | <sup>a</sup> My manager expects me to provide preventive support (n=177)                                                 | 1.1 | 5.6 | 5.6 | 14  | 14  | 40 | 20  |
| 50 | My manager encourages me to provide preventive support (n=176)                                                           | 1.1 | 8.5 | 4.0 | 12  | 17  | 33 | 24  |
| 51 | My manager encourages me to take part in training in the delivery of preventive support (n=174)                          | 2.9 | 14  | 5.2 | 18  | 14  | 25 | 20  |
| 52 | My manager provides feedback on my provision of preventive support (n=150) <sup>b</sup>                                  | 6.0 | 13  | 6.0 | 17  | 19  | 29 | 10  |
| 53 | My organisation monitors the provision of preventive support (n=173)                                                     | 0   | 6.9 | 5.2 | 30  | 18  | 32 | 8.1 |
| 54 | My organisation provides guidelines on the delivery of preventive support (n=174)                                        | 0   | 6.3 | 5.2 | 28  | 20  | 32 | 8.0 |
| 55 | <sup>a</sup> My organisation has provided me with training in the provision of preventive support (n=172)                | 8.1 | 26  | 24  | 8.7 | 13  | 16 | 4.1 |
| 56 | My organisation is committed to improving the physical health of individuals experiencing a mental health issue (n=175)  | 0   | 0.6 | 0.6 | 7.4 | 9.7 | 42 | 40  |
| 57 | My organisation provides resources and aids for me to use in prompting my provision of preventive support (n=168)        | 0   | 8.3 | 9.5 | 23  | 19  | 29 | 11  |
| 58 | My organisation provides resources and aids for me to use in recording a person's health risk behaviours (n=168)         | 0.6 | 4.2 | 3.6 | 14  | 18  | 42 | 18  |

|    |                                                                                                                     |     |     |     |    |    |    |     |
|----|---------------------------------------------------------------------------------------------------------------------|-----|-----|-----|----|----|----|-----|
| 59 | My organisation provides resources and aids for me to use in delivering behaviour change advice (n=167)             | 0.6 | 5.4 | 6.0 | 22 | 19 | 39 | 8.4 |
| 60 | My organisation provides resources and aids for me to use in connecting people to behaviour change services (n=167) | 0.6 | 4.2 | 4.8 | 18 | 20 | 40 | 13  |
| 61 | My organisation provides resources and aids for me to use in recording my provision of preventive support (n=168)   | 1.2 | 6.0 | 6.5 | 24 | 18 | 35 | 10  |

#### **Social Influence**

|    |                                                                                                                                     |     |     |     |    |    |    |     |
|----|-------------------------------------------------------------------------------------------------------------------------------------|-----|-----|-----|----|----|----|-----|
| 62 | I believe people accessing the service would expect me to provide them with preventive support (n=174)                              | 0.6 | 4.6 | 8.6 | 13 | 22 | 37 | 14  |
| 63 | <sup>a</sup> I believe people accessing the service would find it acceptable for me to provide them with preventive support (n=172) | 0   | 1.2 | 5.2 | 12 | 20 | 42 | 19  |
| 64 | I believe other staff in my organisation think I should deliver preventive support (n=166)                                          | 1.2 | 8.4 | 3.0 | 42 | 15 | 26 | 5.4 |

#### **Emotion**

|    |                                                                                                                                  |     |     |    |     |    |    |    |
|----|----------------------------------------------------------------------------------------------------------------------------------|-----|-----|----|-----|----|----|----|
| 65 | <sup>a</sup> I do not feel (or would not feel) burdened by the additional responsibility of providing preventive support (n=174) | 2.3 | 2.9 | 12 | 9.2 | 21 | 37 | 16 |
| 66 | <sup>a</sup> I do not feel (or would not feel) hypocritical when providing preventive support (n=167)                            | 0   | 3.6 | 17 | 11  | 16 | 38 | 14 |
| 67 | <sup>a</sup> I do not feel (or would not feel) uncomfortable when providing preventive support (n=167)                           | 1.2 | 3.0 | 13 | 13  | 18 | 42 | 11 |

#### **Behavioural Regulation**

|    |                                                                                    |     |     |     |     |    |    |     |
|----|------------------------------------------------------------------------------------|-----|-----|-----|-----|----|----|-----|
| 68 | I monitor the preventive support I provide to people accessing the service (n=179) | 1.1 | 7.3 | 3.9 | 11  | 21 | 41 | 16  |
| 69 | <sup>a</sup> Providing preventive support is something I do routinely (n=177)      | 4.5 | 14  | 19  | 4.5 | 16 | 32 | 9.6 |

<sup>a</sup> This item was originally negatively worded, wording and scoring has been reversed in the table

<sup>b</sup> This items was only answered by participants who reported providing preventive care (participants could choose a 'not applicable' response option if they did not provide preventive care).
